# Supplementary material
Source: PubMed Central journal article supplement (PMC10238650)

### Supplemental Materials

| <b>Childhood family stress item</b>                                                                                                 | <b>% of sample that endorsed item as occurring “sometimes” or more often</b> |
|-------------------------------------------------------------------------------------------------------------------------------------|------------------------------------------------------------------------------|
| How often did a parent or other adult in the household make you feel you were loved, supported, and cared for? (reverse coded)      | 18.9%                                                                        |
| How often did a parent or other adult in the household swear at you, put you down, or act in a way that made you feel threatened?   | 26.8%                                                                        |
| How often did a parent or other adult in the household express physical affection for you? (reverse coded)                          | 30.7%                                                                        |
| How often did a parent or other adult in the household push, grab, shove, or slap you?                                              | 18.9%                                                                        |
| In your childhood, did you live with anyone who was a problem drinker or alcoholic, or who used street drugs?                       | 26.8%                                                                        |
| Was the household you grew up in well-organized and well-managed? (reverse coded)                                                   | 26.2%                                                                        |
| How often would you say a parent or other adult in the household behavior violently toward a family member or visitor in your home? | 22.8%                                                                        |
| How often would you say there was quarreling, arguing, or shouting between your parents?                                            | 37.8%                                                                        |
| How often would you say there was quarreling, arguing, or shouting between a parent and one of your siblings?                       | 26.9%                                                                        |
| Was the household you grew up in chaotic and disorganized?                                                                          | 27.2%                                                                        |

| <b>Number of childhood family stress items endorsed as occurring “sometimes” or more often</b> | <b>% (n)</b> |
|------------------------------------------------------------------------------------------------|--------------|
| 0                                                                                              | 33.1 (42)    |
| 1                                                                                              | 11.8 (15)    |
| 2                                                                                              | 15.0 (19)    |
| 3                                                                                              | 9.5 (10)     |
| 4                                                                                              | 4.7 (6)      |
| 5                                                                                              | 8.7 (11)     |
| 6                                                                                              | 4.7 (4)      |
| 7                                                                                              | 5.5 (7)      |
| 8                                                                                              | 2.4 (3)      |
| 9                                                                                              | 3.9 (5)      |
| 10                                                                                             | 1.6 (2)      |

How often did a parent or other adult in the household make you feel that you were loved, supported, and cared for?

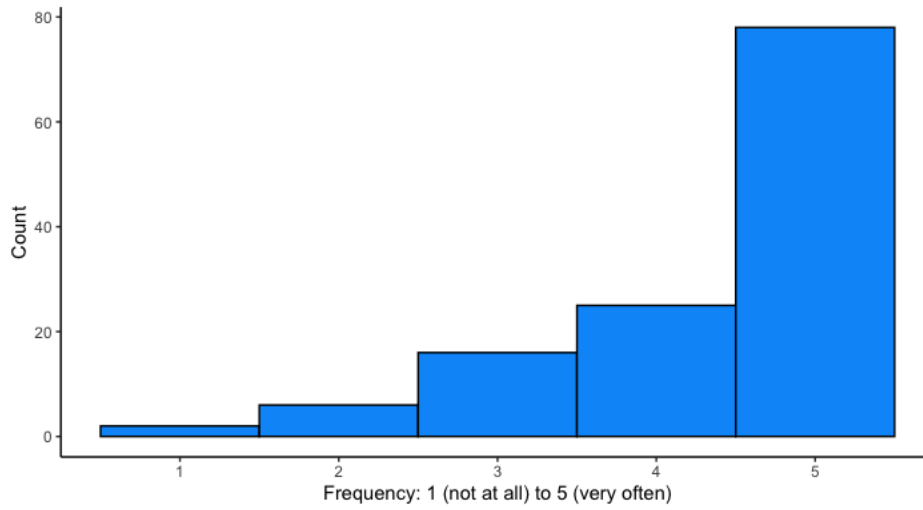

How often did a parent or other adult in the household swear at you, put you down, or act in a way that made you feel threatened?

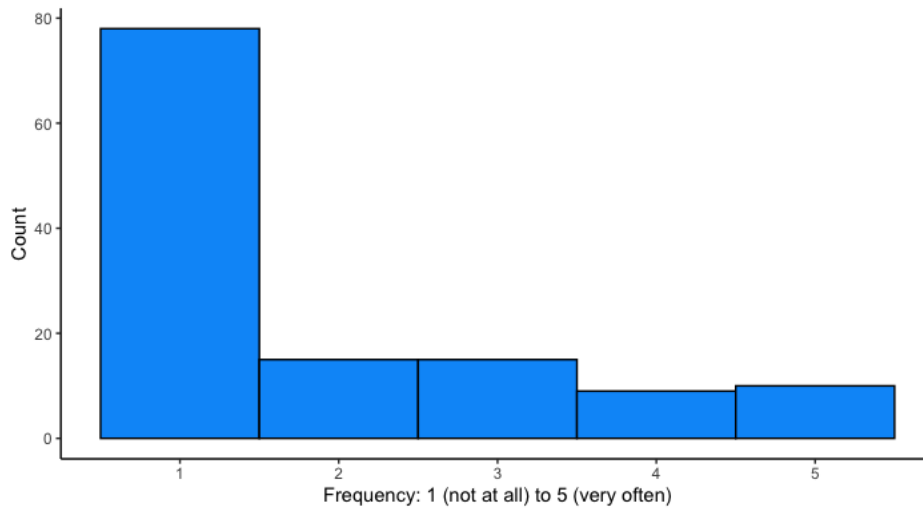

How often did a parent or other adult in the household express physical affection for you?

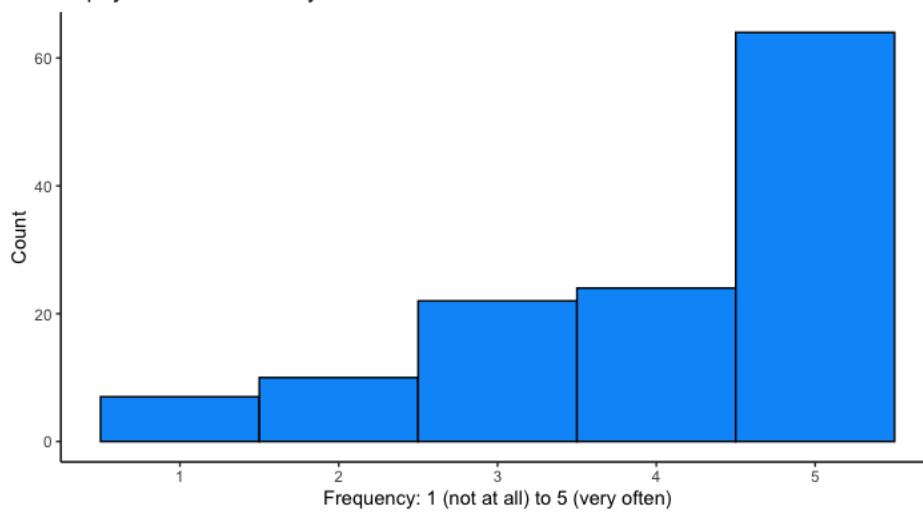

How often did a parent or other adult in the household push  
grab, shove, or slap you?

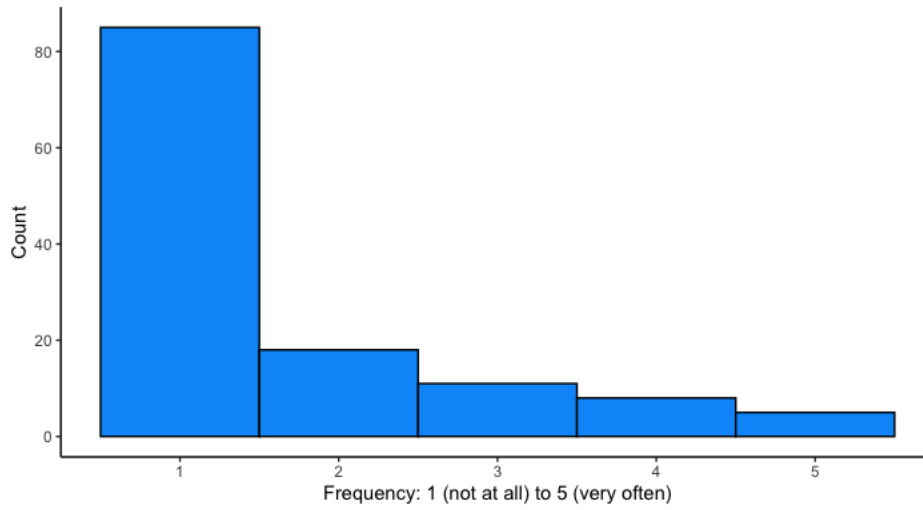

Was the household you grew up in well-organized and  
well-managed?

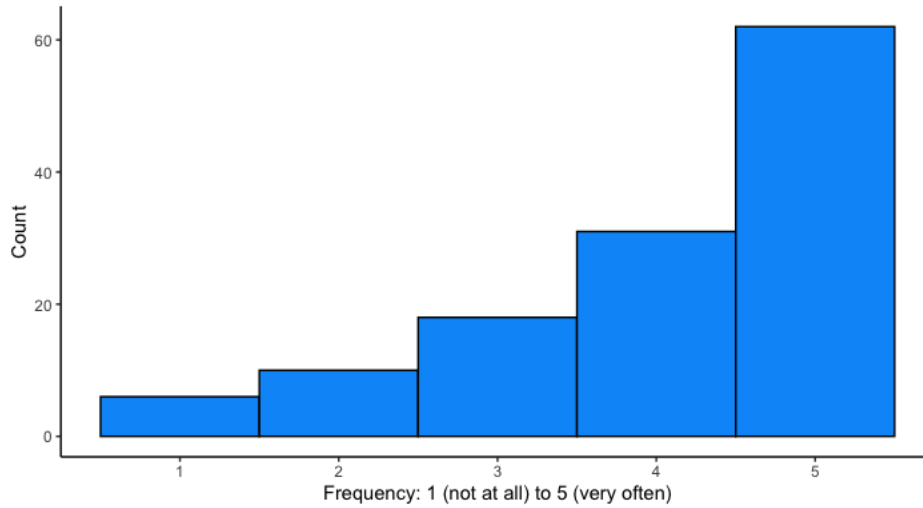

In your childhood, did you live with anyone who was a problem  
drinker or alcoholic, or who used street drugs?

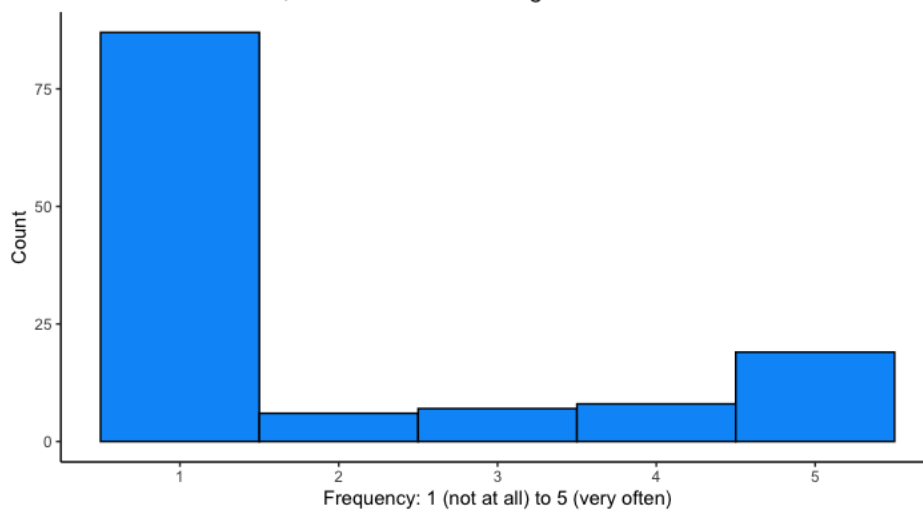

How often would you say that a parent or other adult in

the household behaved violently toward a family member or visitor in your home?

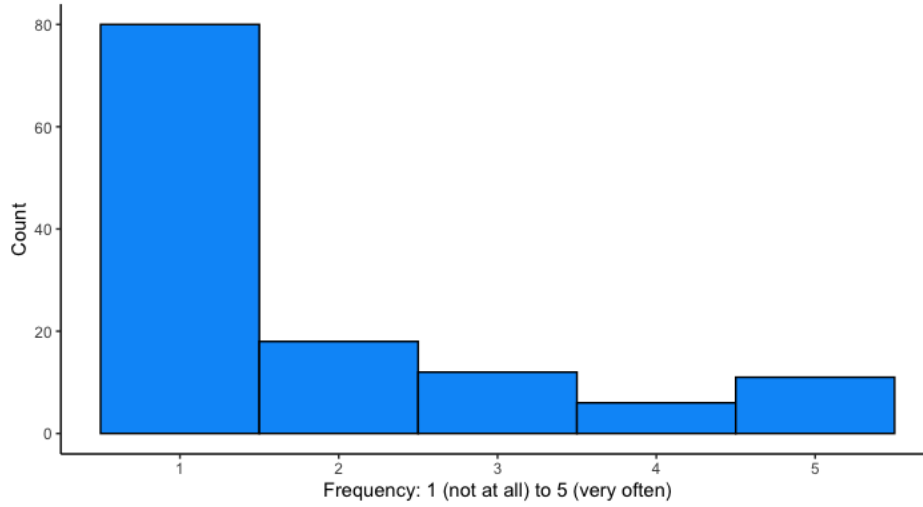

How often would you say there was quarreling, arguing, or shouting

between your parents?

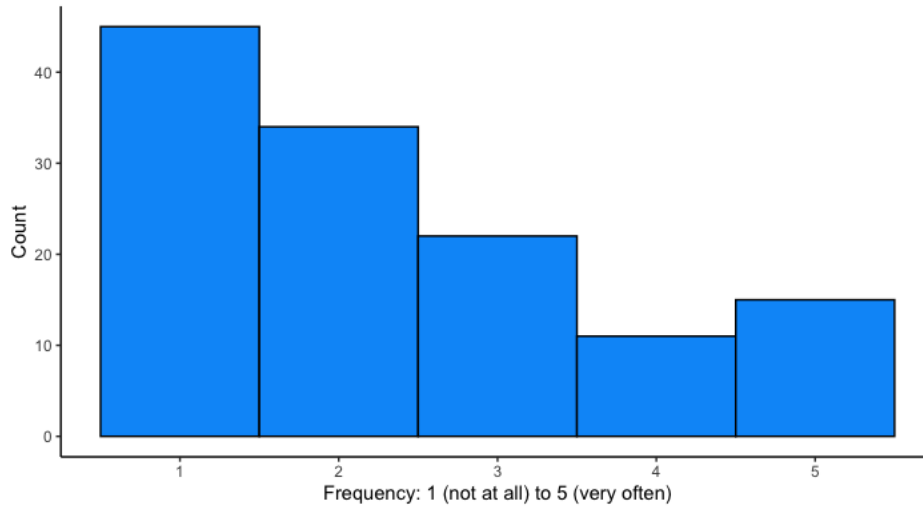

How often would you say there was quarreling, arguing, or shouting

between a parent and one of your siblings?

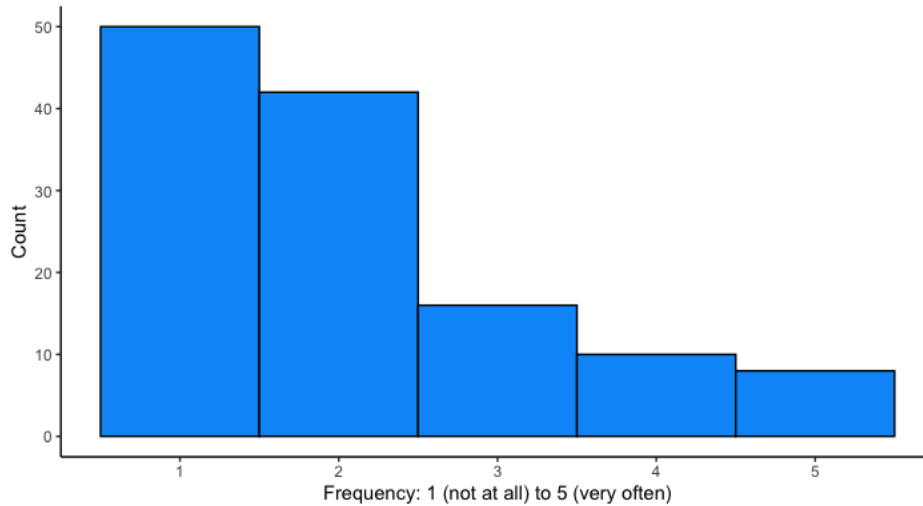

Was the household you grew up in chaotic and disorganized?

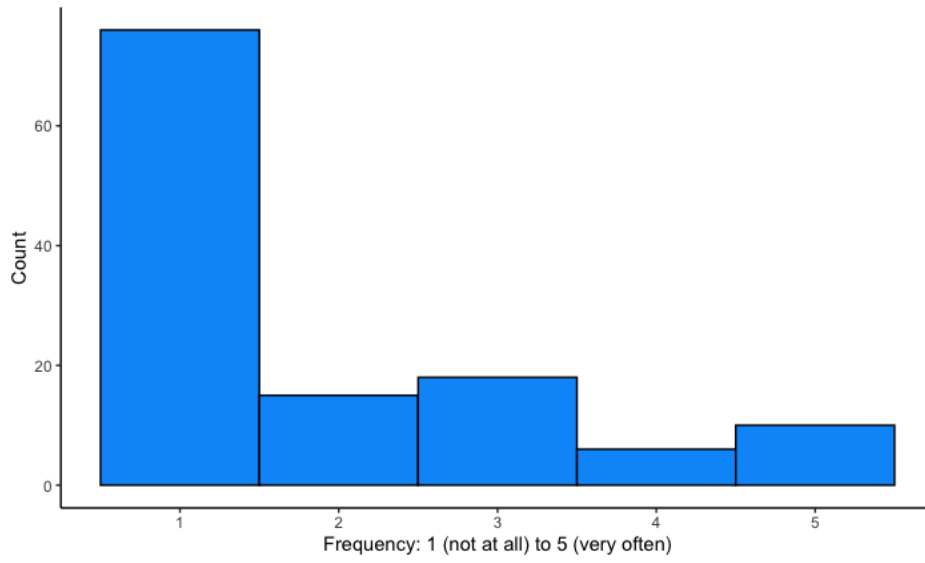

Supplement: NIHMS1880375-supplement-Supplemental_Material.pdf [file NIHMS1880375-supplement-Supplemental_Material.pdf]
